# Supplementary material for: Prion strains associated with iatrogenic CJD in French and UK human growth hormone recipients
Source: Acta Neuropathol Commun. 2021 Aug 28;9:145. doi: 10.1186/s40478-021-01247-x (PMC8403347; doi:10.1186/s40478-021-01247-x)
Supplement: Supplementary file 1 — Additional file 1: Table S1. End point titration of sporadic CJD MM1 and VV2 isolates in transgenic mice expressing the human PrP. [file 40478_2021_1247_MOESM1_ESM.docx]

**Sup Table 1:** End pointtitration of Sporadic CJD MM1 and VV2 isolates in transgenic mice expressing the human PrP

|  | **MM1 (case 1)** | | | | |  | **VV2 (case 2)** | | | | |
| --- | --- | --- | --- | --- | --- | --- | --- | --- | --- | --- | --- |
|  | **Tg Met129** | |  | **Tg Val129** | |  | **Tg Met129** | |  | **Tg Val129** | |
|  | **Positive mice** | **Incubation period** |  | **Positive mice** | **Incubation period** |  | **Positive mice** | **Incubation period** |  | **positive mice** | **Incubation period** |
| **neat** | 6/6 | 186±10 |  | 6/6 | 286±18 |  | 6/6 | 585±24 |  | 6/6 | 166±11 |
| **10-1** | 6/6 | 213±15 |  | 6/6 | 347±16 |  | ND |  |  | 6/6 | 191±9 |
| **10-2** | 6/6 | 240±13 |  | 1/6 | 390 |  | ND | - |  | 6/6 | 203±9 |
| **10-3** | 6/6 | 263±24 |  | 0/6 | >650 |  | ND | - |  | 6/6 | 252±16 |
| **10-4-** | 6/6 | 296±26 |  | 0/6 | >650 |  | ND | - |  | 1/6 | 294 |
| **10-5** | 6/6 | 323±29 |  | 0/6 | >650 |  | ND | - |  | 0/6 | >650 |
| **10-6** | 1/6 | 316 |  | 0/6 | >650 |  | ND | - |  | 0/6 | >650 |
| **10-7** | 0/6 | >600 |  | ND | - |  | ND | - |  | 0/6 | >650 |

Successive 1/10 dilutions of 10% brain homogenate (frontal cortex) from an MM1 and a VV2 sCJD-affected patient were inoculated intracerebrally to tgMet (*n*=6) and tgVal mice (*n*=6). Mice were euthanized when they showed clinical signs of infection or after 650 days. Mice were considered infected when PrPres deposition was detected in their brain by western blot using the Sha31 monoclonal antibody, which recognizes amino acids 145–152 (YEDRYYRE) of the sheep PrP. ND: not done. Incubation periods (in days) are shown as mean±standard deviation (SD) except when less than 100% of the animals developed clinical sign. In that case individual incubation period are presented. The data included in this table were already used in Huor et al 2017 16.
